# Supplementary figures and images for: Gasdermin D Inhibitor Necrosulfonamide Alleviates Lipopolysaccharide/D-galactosamine-induced Acute Liver Failure in Mice
Source: PubMed Central journal article supplement — J Clin Transl Hepatol. 2022 Mar 8;10(6):1148–54. doi: 10.14218/JCTH.2021.00560 (PMC9634782; doi:10.14218/jcth.2021.00560), 2022-03-08

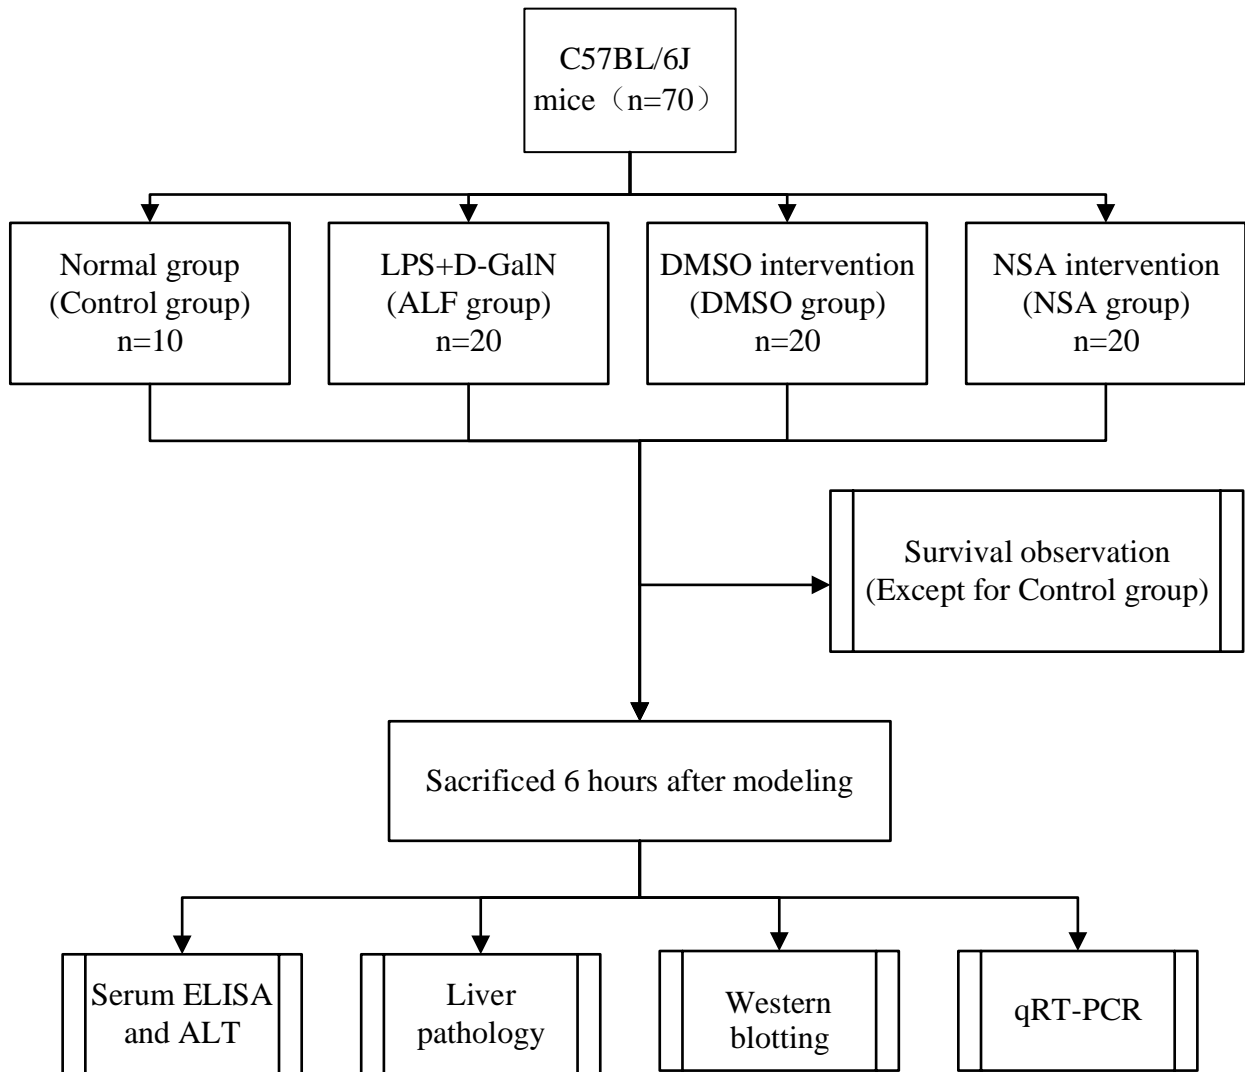

Supplement: JCTH-10-1148-s001.pdf [file JCTH-10-1148-s001.pdf]

**Control**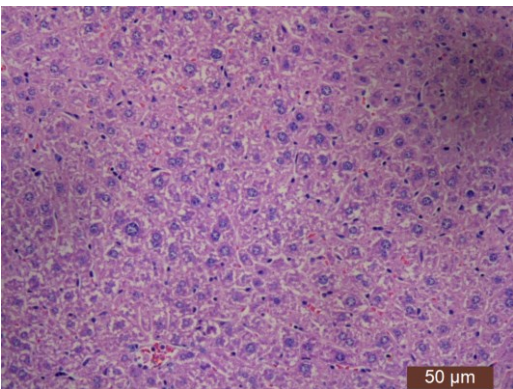**ALF**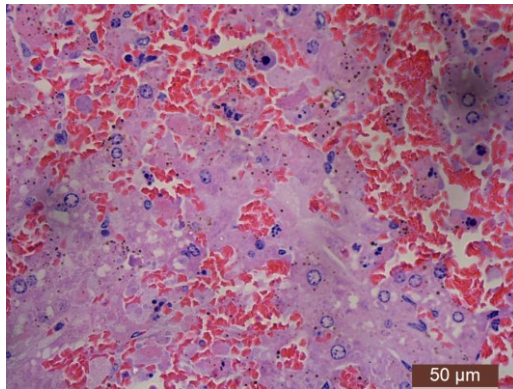**DMSO**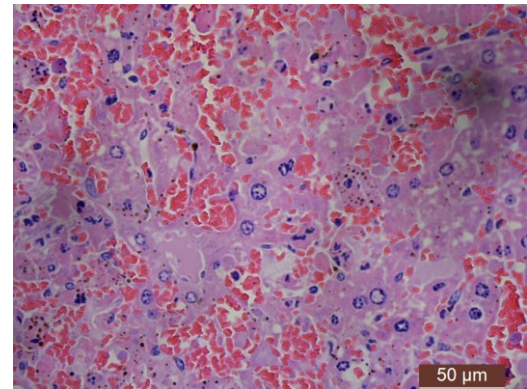**NSA**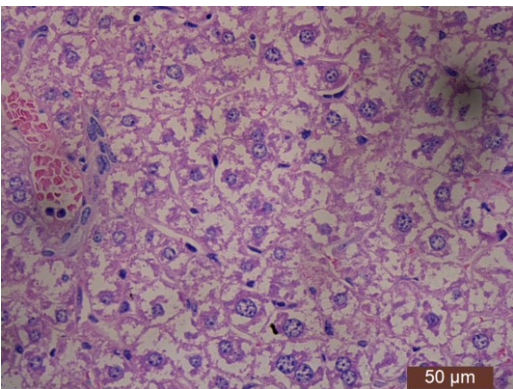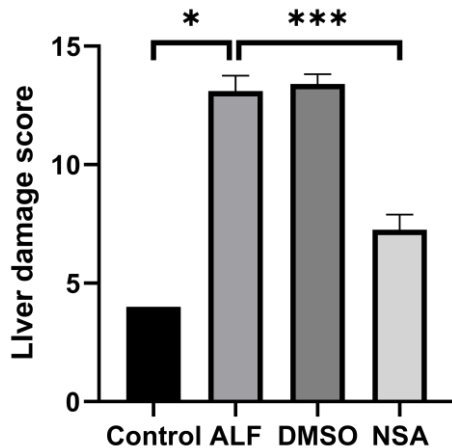

Supplement: JCTH-10-1148-s002.pdf [file JCTH-10-1148-s002.pdf]
